# Supplementary material for: Genome-Wide Identification of PLATZ Transcription Factors in Ginkgo biloba L. and Their Expression Characteristics During Seed Development
Source: Front Plant Sci. 2022 Jun 23;13:946194. doi: 10.3389/fpls.2022.946194 (PMC9262033; doi:10.3389/fpls.2022.946194)
Supplement: Supplementary File — The sequences of the 11 GbPLATZ proteins. [file Table_1.xlsx]

## Sheet: Table_S1-SRR
Supplemental Table 1 The SRR_ID of the public data from NCBI
Tissue name	SRR_ID
Jun-kernel	SRR12882911	SRR12882910	SRR12882907
Oct-kernel	SRR12882906	SRR12882905	SRR12882904
Jan-kernel	SRR12882903	SRR12882902	SRR12882901
Mature-fruit	SRR7226353	SRR7226354	SRR7226355
Immature-fruit	SRR7226375	SRR7226376	SRR7226356
Mature-root	SRR7226359	SRR7226360	SRR7226357
Mature-stem	SRR7226358	SRR7226363	SRR7226364
Immature-leaf	SRR7226361	SRR7226362	SRR7226365
Mature-leaf	SRR7226366	SRR7226369	SRR7226370
Mature-microstrobilus	SRR7226367	SRR7226368	SRR7226373
Mature-ovulate strobilus	SRR7226371	SRR7226372	SRR7226374
Jun-leaf	SRR13517565	SRR13517564	SRR13517563
Aug-leaf	SRR13517562	SRR13517561	SRR13517560
Oct-leaf	SRR13517559	SRR13517558	SRR13517557
Testa	SRR10913201	SRR10913202	SRR10913203
Sterile seedling	SRR325165
Secondary stem	SRR325166

## Sheet: Table_S2-qRT-PCR
Supplemental Table 2 The qRT-PCR primers of 11 GbPLATZs and reference genes
Gene name	Gene ID	Primer-F	Primer-R
EIF3D (reference genes)		AGGCCGCATATGTAAACCAG	TGGACCTCACACCTTGCAAC
GAPDH (reference genes)		GGTGCCAAAAAGGTGGTCAT	CAACAACGAACATGGGAGCAT
GbPLATZ1	chr2.201	CAGATGAAGCCACAGCCAAT	TTGGTCTCCTGAAACACCCAT
GbPLATZ2	chr2.1059	ATGGTTGGATATGCTCTGT	AGAAGCCGATGTGTTGTA
GbPLATZ3	chr3.742	TTACAAGACGAGGAAATAGGA	CATACAATGGAGGCAATACAT
GbPLATZ4	chr3.2215	TGAATCTCTGCCACTCTC	GTCCTCCAACTCACCATT
GbPLATZ5	chr3.2248	ATCCGGTTTCTCCAAATTCTGT	ACAGGACTTTCTTCGCCAAC
GbPLATZ6	chr6.1186	AATATGTACTGCCTAGATTGTATG	TCTGAACGCCTGTAATGT
GbPLATZ7	chr6.2014	CCTACCGATATTGCTCTGTA	GAGGAGGTTGAAGATAAGGA
GbPLATZ8	chr7.1438	TATCAAGTGCTCCGTCTG	CACCCTTTCTTCTCCTCTT
GbPLATZ9	chr9.1892	TTGTGTTCTTCCTGTCTCA	TTCTCGCACTGTTGATAATG
GbPLATZ10	chr10.1557	CATACCACTACTGCTCCTT	ATCTCCATTATCGGCCTTCA
GbPLATZ11	chr10.1967	TGTTATCGTTGCGTAATGAG	CGAGACAATAAGAGCACAAT

## Sheet: Table_S3-PlantCARE
Supplemental Table 3. The predicted promoter cis-elements of GbPLATZs by PlantCARE
Annotation category	Motif name	Gene name											SUM	COUNT	Feature of Groups
		GbPLATZ1	GbPLATZ2	GbPLATZ3	GbPLATZ4	GbPLATZ5	GbPLATZ6	GbPLATZ7	GbPLATZ8	GbPLATZ9	GbPLATZ10	GbPLATZ11			I	II	III	IV
Transcription	CAAT-box	56	5	41	34	4	42	37	45	31	44	46	466	11	I	II	III	IV
	TATA-box	63	21	21	46	44	3	35	23	12	22	7	297	11	I	II	III	IV
	Total	119	26	62	80	48	45	72	68	43	66	53			55.3333	73	50.75	83.5
Developmental processes	as-1	1	1	2	2		1	2	1	7	1	5	23	1	I	II	III
	AACA_motif									1
	CAT-box		1	2				1	4	1			9	5	I
	CCGTCC-box						1	2					3	2
	circadian			1				1	1				3	3
	GCN4_motif			1			1		1				3	3
	MBSI						1				1		2	2
	MSA-like						2		1				3	2
	NON-box							1					1	1
	O2-site	1		1				1			1		4	4
	plant_AP-2-like				1							1	2	2
	re2f-1										1		1	1
	Total	2	2	7	3	0	6	8	8	9	4	6			6	3.5	7	1
Hormone	ABRE		1	1		1	4	4	1	4	2	6	24	9	I		III
	ABRE2									1		1	2	2
	ABRE3a		1							2		1	4	3
	ABRE4		1							2		1	4	3
	CGTCA-motif	1	1	2	2		1	2	1	7	1	5	23	1	I	II	III
	GARE-motif	1						1		1			3	3
	P-box			1		1			1	2		2	7	5
	TCA	1		4		2			1		2		1	5				IV
	TCA-element				2				1	1			4	3
	TGACG-motif	1	1	2	2		1	2	1	7	1	5	23	1	I	II	III
	TGA-element		2				2	2		1	1	1	9	6
	Total	4	7	10	6	4	8	11	6	28	7	22			8	6.5	17	4
Abiotic/biotic stress	3-AF1 binding site				1						1		2	2		II
	ACE		1	1	1					1			4	4
	AE-box				2	2	1	1		2		1	9	6
	AP-1							1					1	1
	ARE	4	2	3		5	6	1	5			3	29	8	I			IV
	AT~TATA-box	5		1		7		4	1	1	1		2	7				IV
	ATC-motif		1				1		1				3	3
	ATCT-motif					1			1	1		1	4	4
	AT-rich sequence		1	1			1						3	3
	Box 4	2	1	2	3			2	2			3	15	7	I
	Box II			1								2	3	2
	box S		1							1			2	2
	CARE			1		1							2	2
	CCAAT-box		3				1		1	1		1	7	5
	chs-CMA1a	1		1			1			1			4	4
	chs-CMA2a				1	2					1		4	3		II
	DRE core						2			6			8	2
	DRE1		1				1						2	2
	ERE		1	2	2	1	1					1	8	6
	GA-motif	1		1				1					3	3
	GATA-motif			2					0	1	1	1	5	4
	G-box	1	1	3	1	2	5	7	1	5	1	1	37	11	I	II	III	IV
	GC-motif						2						2	1
	GT1-motif		3		1		1		3		1	2	11	6		II
	I-box					1		1			1		3	3
	LAMP-element			1				1				1	3	3
	LTR						1	1	1			2	5	4
	MBS	1	2						1			1	5	4
	MRE				1			1	1	2			5	4
	Myb	8	7	7	3	2	3	4	2	5	5	4	5	11	I	II	III	IV
	MYB	8	7	7	3	2	3	4	2	5	5	4	5	11	I	II	III	IV
	MYB recognition site		3				1		1	1		1	7	5
	Myb-binding site	2						2		1	2	2	9	5
	MYB-like sequence	2	3	3	1		1			2	1		13	7		II
	MYC	3	5	4	9	5	4	3	7	2	7	7	56	11	I	II	III	IV
	Myc	3	5	4	9	5	4	3	7	2	7	7	56	11	I	II	III	IV
	Sp1			1				2		1			4	3
	STRE	2	3	2	4	1		4	5	5	4	1	31	1	I	II		IV
	TATA		1		2					1			4	3
	TCCC-motif			1		1					1		3	3
	TC-rich repeats								2			2	4	2
	TCT-motif			1			2		2	1	1	1	8	6			III
	W box			1	1	1	1	1	2		1	2	1	8		II
	WRE3	4					1			2	2	3	12	5
	WUN-motif	2			1	2		2	2	1	1	1	12	8		II		IV
	Total	49	52	51	46	41	44	46	50	51	44	55			49.3333	45	50.25	45
other	AAGAA-motif	3	1	2		2	2						1	5				IV
	AC-I									1			1	1
	AT-rich element				1								1	1
	CTAG-motif							1					1	1

## Sheet: Table_S4-PLACE
Supplemental Table 4. The predicted promoter cis-elements of GbPLATZs by PLACE
Motif name	Key words	GbPLATZ1	GbPLATZ2	GbPLATZ3	GbPLATZ4	GbPLATZ5	GbPLATZ6	GbPLATZ7	GbPLATZ8	GbPLATZ9	GbPLATZ10	GbPLATZ11	Sum	Count
EBOXBNNAPA	napA, storage protein, ABRE, E-box, seed,	16	18	2	18	28	8	1	18	14	12	22	184	11
MYB2CONSENSUSAT	MYB, rd22BP1, ABA, leaf, seed, stress,	5	6	2	1	1	4	2	2	4	1	6	34	11
CAATBOX1	CAAT, legA, seed,	34	23	28	16	26	3	2	26	21	3	33	287	11
MYB1AT	MYB, rd22BP1, ABA, leaf, seed, stress,	6	5	6	1	5	7	1	5	2	1	3	42	11
SEF4MOTIFGM7S	soybean, seed, storage protein, 7S, globulin, beta-conglycinin, SEF,	3	2	2	1	3	6	6	3	1	5	3	35	11
CANBNNAPA	(CA)n element, napA, napin, seed, storage protein,	1	1	3	2	2	1		1	2	1	3	17	10
SEF3MOTIFGM	SEF3, beta-conglycinin, 7S, globulin, seed,	6	1	1	2			1	2	3	1	3	20	9
RYREPEATBNNAPA	RY repeat, RY/G box, seed, napA, napin,	1		1	2	2	2	1		1	2	2	14	9
-300ELEMENT	-300 element, hordein, gliadin, glutenin, seed,	1	1	3		2	3		6	2		3	21	8
MYBPZM	P, P-gene, MYB, myb, seed,	1		2		1	2		1	2		3	12	7
DPBFCOREDCDC3	Dc3, lea class gene, embryo, ABA, DPBF-1, DPBF-2, bZIP, GIA1,	3		2		3	1		3	3		1	16	7
CAREOSREP1	aleurone, GARE, gibberellin, seed,	1	2	3	2	1	1		1				11	7
ERELEE4	Ethylene, E4, GST1, senescence, ERE, fruit,		2	1	2		1	2			2	1	11	7
AMYBOX1	amylase, seed,		1	1	3		1	1	1		1		9	7
AACACOREOSGLUB1	glutelin, AACA, GCN4, seed, endosperm,	1		4		1	5	1			4		16	6
2SSEEDPROTBANAPA	storage protein, ABRE, napA, 2S, seed,			1	2	1	1			1		2	8	6
PROLAMINBOXOSGLUB1	prolamine box, GluB-1, seed, endosperm,		1	1			1		2	1			6	5
TGACGTVMAMY	alpha-Amylase, cotyledon, seed germination, seed,			1	1			2		2		1	7	5
RYREPEATLEGUMINBOX	RY repeat, legumin box, seed, storage protein, RYREPEATVFLEB4				1	1	2	1		1			6	5
AMYBOX2	amylase, seed,	2						2	1		1		6	4
SEF1MOTIF	soybean, storage protein, 7S, globulin, beta-conglicinin, seed,	2				1			2				5	3
GCN4OSGLUB1	GluB-1, glutelin, endosperm, seed, storage protein, GCN4 motif,			1			1		1				3	3
RYREPEATGMGY2	glycinin, CATGCAT, Gy2, seed,				1		2	1					4	3
-300CORE	zein, core motif, maize, -300 element, promoter, prolamin-box, P-box, seed, endosperm,				1	1						1	3	3
NAPINMOTIFBN	napin, 2S albumin, seed, storage protein,								1		1	1	3	3
TGTCACACMCUCUMISIN	cucumisin, fruit,		1		1								2	2
CARGNCAT	MADS, AGAMOUS, AGL, embryo,			2				2					4	2
EMHVCHORD	EM, endosperm, hordein, nitrogen,					1						1	2	2
ACGTCBOX	C-box, ACGT element, seed,							4		2			6	2
CEREGLUBOX2PSLEGA	legumin, glutenin, cereal, legA, seed,	1											1	1
SPHCOREZMC1	Sph motif, C1, VP1, ABA, seed,				1								1	1
GADOWNAT	Ga, seed, germaination,					1							1	1
-300MOTIFZMZEIN	zein, core motif, maize, -300 element, seed, endosperm,						1						1	1
GARE1OSREP1	aleurone, GARE, gibberellin, seed,						1						1	1
ABREOSRAB21	ABA, ABRE, Em, rab, Em1a, Em1b, seed,						1						1	1
ACGTABOX	A-box, ACGT element, G motif, sugar, repression, seed,										2		2	1
EMBP1TAEM	EMBP-1, Em, ABA, ABF, ABRE, bZIP, seed,											1	1	1

## Sheet: Table_ S5-NLS
Supplemental Table 5 Prediction of subcellular localization of GbPLATZ proteins
Gene name	Predicted location(s)	Predicted NLS peptide	Start	End	Score
GbPLATZ1	Nucleus.	IVFLLRPKAKMHHGRSKRRCVNCKRGLNDA	105	135	0.94411
		PLKKRIRIKERSNDWL	212	227	0.94336
		HLHGRLHKRNSRKNRRKHTPHRSPLW	323	348	0.96568
GbPLATZ2	Nucleus.	VKKICRRVAAP	220	230	0.93026
GbPLATZ3	Nucleus.	NYRTARKRKGIP	206	217	0.94853
GbPLATZ4	Nucleus.	VKKKRSG	222	228	0.94399
		RRKGTPQRSP	246	255	0.93124
GbPLATZ5	Chloroplast. Nucleus.	FLLRPKAKLHDGRSKRRCVSCNRG	105	128	0.94027
		SPIKKRRTDQN	231	241	0.94881
		VSQQKPSSGLMSDSFRKKRRKGIPRRAPMY	282	311	0.95419
GbPLATZ6	Nucleus.	TPPRDPFKNRHVRRPRKGIPHRAPLGS	260	296	0.94122
GbPLATZ7	Nucleus.	RRKGFPHRSP	239	248	0.93602
GbPLATZ8	Nucleus.	SPKSVICPPKRRRKGVPHRSPIC	231	253	0.94911
GbPLATZ9	Nucleus.	THKRARLTKKNFHR	172	185	0.9496
		NYRTARRRKGIPHRAPLGS	240	258	0.93007
GbPLATZ10	Nucleus.	FVKKKRSG	243	250	0.94314
		RRKGTPQRSP	268	277	0.93358
GbPLATZ11	Nucleus.	NYRTTKRRKGIPHRAPLGS	222	240	0.9327
